1           **Too Close to Eat? Solidarity with Animals, Animal Welfare and Meat Consumption**

2  
3                           Albert Boaitey<sup>1\*</sup>, Michaela Eden<sup>1</sup> and Simon Jette-Nantel<sup>1</sup>

4  
5  
6  
7  
8   <sup>1</sup> Department of Agricultural Economics, University of Wisconsin-River Falls, River Falls,  
9 Wisconsin, United States of America.

10  
11  
12  
13   \*corresponding author

14   Email: [albert.boaitey@uwrf.edu](mailto:albert.boaitey@uwrf.edu) (AB)

15  
16  
17  
18   AB is senior author

## 40 **Abstract**

41 Meat consumption is influenced by a variety of factors including of empathy and feelings on  
42 affinity towards farm animals. The goal of this study was to examine the role of solidarity with  
43 animals on meat consumption and attitudes towards the treatment of animals. Data was drawn  
44 from a sample of 265 respondents in the US. Correlation and mediation analyses were performed.  
45 The results of the correlation analysis indicate a moderate but positive correlation between  
46 solidarity with animals and proecological beliefs. The association between attitudes towards the  
47 treatment of farm animals and antibiotic use and solidarity with animals was also positive. Relative  
48 to meat consumption, the results indicate that proecological beliefs and concerns about the  
49 treatment of farm animals negatively influenced consumption. The effect of attitudes towards  
50 antibiotic use and solidarity with animals on consumption were however fully mediated by  
51 proecological beliefs. The results indicate that social identification with animals can play a  
52 significant role in food choice. However, its relationship with proecological beliefs implies that  
53 holistic approaches are required to address current livestock production practices that are  
54 considered unnatural.

55

56

57

58

59

60

61

62

63

64

## 65 **Introduction**

66 Animal welfare appears to be increasingly important in many countries and it even has become an  
67 official part of Schwartz's well-known theory of human values [1]. Concerns about farm animals  
68 relate to how animals are treated and kept. These concerns differ across species and can elicit  
69 different responses (such as meat avoidance) from consumers. In general, reductions in the  
70 consumption of meat are mostly driven by consumers' personal health and ethical motives [2,3,  
71 4]. In relation to animal welfare, consumers may reduce meat consumption to avoid causing harm  
72 to farm animals or as a result of concerns about practices considered unnatural [5]. Animal and  
73 human welfare attitudes also influence behaviors such as support for animal rights and causes [2,  
74 6]. These attitudes are underpinned by different values and motivations including the extent to  
75 which consumers feel connected to farm animals [7]. Human-animal relations are multi-faced in  
76 nature and aspects such as affinity with animals have been linked with a number of behaviors:  
77 attribution of a higher cognitive ability, anthropomorphism and anti-consumption [8, 9, 10]. The  
78 pathways through which these attitudes influence consumer behavior in relation livestock  
79 production and consumption are however less understood. This paper focuses on a different  
80 aspect of human-animal relation i.e., the concept of solidarity with animals. Solidarity with  
81 animals is the sense of connectedness to animals as part of the same social group [11, 12]. This  
82 psychological bond with farm animals can have significant implications for public attitudes  
83 towards different treatment and farm practices, and meat consumption behavior. It is conceivable  
84 that solidarity with animals is linked to a broader connection to nature and a proecological  
85 orientation. This notwithstanding, not much has been done to examine the links between solidarity  
86 with animals and these important aspects of meat production and consumption. This is partly due

87 to the absence of a well-validated metric to measure solidarity with animals. A solidarity with  
88 animals' scale with good psychometric properties has recently been introduced [11]. In this study,  
89 we investigate the relationship between solidarity with animals, proecological beliefs, treatment  
90 of farm animals and pork consumption using data from a sample of participants in the United  
91 States. Our interest in the role of solidarity is informed by evidence from previous studies [6, 2]  
92 which suggests that solidarity with animals can influence socially consequential actions.  
93 Amongst the current litany farm animal welfare issues, the use of antibiotics in livestock  
94 production presents a unique case because of its ethical and human health impacts. The latter is  
95 in relation to the public health risks posed by the veterinary overuse of antimicrobials and the  
96 possibility of animal-human transfer of antimicrobial resistance [13, 14]. The Food and  
97 Agricultural Organization (FAO) estimates substantial economic and health consequences<sup>1</sup>  
98 resulting from antimicrobial resistance (AMR) if current trends continue [15]. In contrast to the  
99 negative human health impacts, the use of antibiotics can enhance animal welfare by reducing or  
100 eliminating the pain associated with disease. Inherent in the dual impacts of antibiotic use is the  
101 conundrum faced by consumers who may be concerned about the treatment of animals on farms  
102 and the possible negative health impacts. It is obvious that feelings of connectedness to animals  
103 further complexifies these relationships. Further, we focus on the hog production in the US for two  
104 reasons. First, available estimates indicate that antibiotics are significantly overused in pig  
105 production in US - 27.1% of all medically sold antibiotics is used in pigs as compared to the 27.6%  
106 is used in human medicine [16]. Second, these high levels of antibiotic use are linked to production  
107 and husbandry practices such as the high degree of concentration [16]. For the pork industry,  
108 insights from this study is particularly relevance given the current changes in the consumption, the

---

109 need to provide an appropriate level of animal welfare and the emergence of new products such as  
110 lab-grown meat often marketed as animal welfare friendly [17].

## 111 **Literature review**

112 The subject of the effect of human-animal relationship on consumer behavior has been of long-  
113 standing interest because of its influence on a number of attitudes and behaviors [6, 9]. These  
114 attitudes can also serve as a motivation for ethical food choice [4]. It has been shown that  
115 associating humanlike attributes such as perceived intelligence and appearance to animals  
116 influences disgust at the thought of eating meat which leads to meat avoidance [18, 9, 5].  
117 However, the extent to which animals are considered similar humans can dampen or exacerbate these  
118 responses [7]. Other studies have looked at the role of psychological commitments to groups such  
119 as solidarity with animals, as a determinant of attitudes towards animals [11]. The authors found  
120 that solidarity with animals, was negatively associated with meat eating frequency, higher moral  
121 concerns for animals, and a greater likelihood to donate to animal charities. This social identity  
122 dimension of attitudes towards animals influences other consumer response (such as activism for  
123 animal rights) in so-called factory farms which are often considered unnatural [6]. Perceptions  
124 about animal welfare are also influenced by both objective and normative judgements [19]. The  
125 authors found that animals experiencing negative emotions but living in their natural setting were  
126 perceived as experiencing a higher animal welfare standard [19]. This is in comparison to animals  
127 in unnatural settings experiencing positive emotions. This may be indicative of linkages between  
128 perceived FAW and proecological attitudes and by extension meat consumption. Other studies  
129 have examined the effect of proecological attitudes (as measured by the New Ecological Paradigm  
130 (NEP) scale) [20], on meat consumption, however, the evidence appear inconclusive [21]. In this  
131 study, we explore the relationship between attitudes towards antibiotic use, the treatment of  
132 animals, proecological beliefs and solidarity with farm animals. We also model the relationship

133 between these variables and their influence on pork consumption using mediation analysis. The  
134 use of mediation models to address similar problems have been reported in the literature [14, 22,].  
135 In this study, the effect of solidarity with animals, attitude towards antibiotic use on meat  
136 consumption is assumed to be mediated by proecological beliefs.

137

## 138 **Methods**

139 An online survey instrument designed in Qualtrics was used to collect data used in the study in  
140 February and March of 2019. The study adhered to the ethical guidelines and was approved by the  
141 Institutional Review Board (IRB) of the University of Wisconsin – River Falls (approval number:  
142 H2018 KO10). In total 265 responses were obtained from random of 1,000 adult respondents who  
143 provided their email address to the Survey Research Center (SRC) at the University of Wisconsin-  
144 River Falls and received an email with a hyperlink to the survey. Out of the total returned, 207  
145 questionnaires were answered completely and were therefore considered usable. Incomplete  
146 surveys were considered invalid. The sample included 83% (n=171) females and 17% (n=36) male.  
147 The latter is lower than the share of males in Wisconsin which is about 50% (US Census Bureau,  
148 2019). The mean age of participants in this study was 34.4 (SD=16.45), lower than the 38.92  
149 reported in the 2017 US census. The average household income of \$68,852 (SD=\$3,3283),  
150 reported in our survey was however higher than the average income of \$56,769 in Wisconsin in  
151 2017 [23]. In general, the differences between the sample and the general population are expected  
152 given that most of our respondents were in the River Falls area.

153 The questionnaire was divided into three subsections. In the first part, respondents were asked to  
154 provide information on their pork purchase frequency and their preferences for different pork  
155 attributes. The second part of the questionnaire included scale items that measured respondents'  
156 attitude towards farm animals, the use of antibiotics in livestock , the environment etc. This section

157 also included the solidarity with animals scale. The last section of the questionnaire measured  
158 respondents' socio-demographic characteristics. Below is an overview of selected questions  
159 included in the present analysis.

160 To measure the frequency of pork consumption, participants were asked, "How often do you  
161 consume pork". Responses were rated on an eight-point scale with end points: 0=never, to 7=daily.  
162 Three measures of animal welfare attitudes and perceptions were included in the survey: attitude  
163 towards the treatment of animals [24] and attitudes towards antibiotic use [25]. A five-point Likert  
164 scales with end points, 5=strongly agree to 1= strongly disagree, was used in the animal treatment  
165 and antibiotic use scales. Proecological attitudes were measured with a reduced version of the  
166 New Ecological Paradigm (NEP) scale, comprising 6 items rated on a 5-point scale (1= strongly  
167 disagree; 5=strongly agree) [20]. Three of the six items capture the pro-anthropocentric dominant  
168 social paradigm (DSP) whilst the remaining statements capture a proecological orientation (See  
169 Table 4).

170 Following [11], a five-item scale was used to measure solidarity with animals. The scale comprised  
171 of the following items each rated on a seven-point scale with endpoints, 1=strongly  
172 agree;7=strongly disagree: "I feel a strong bond toward other animals"; "I feel solidarity toward  
173 animals"; "I feel close to other animals"; "I feel a strong connection to other animals"; and, "I feel  
174 committed toward animals".

## 175 **Statistical Analyses**

176 Multiple approaches were used to analyze the data. These include principal components analysis  
177 (PCA), independent sample t-tests and mediation analysis. The PCA approach was used to extract  
178 factors from the multi-items. Pearson correlation coefficient between the solidarity with animals  
179 scale and the: attitudes towards the treatment animals, antibiotics use in livestock statements and  
180 and proecological were also estimated. The PCA and correlation analysis were performed in

181 performed using IBM SPSS software (version 24). Mediation analyses were conducted to assess  
 182 the total effect of solidarity with animals on meat consumption frequency in addition to the extent  
 183 to which this effect is mediated by proecological beliefs. We also estimated the mediated  
 184 moderation pathway (indirect effect of attitudes towards antibiotics use and the treatment of  
 185 animals) on consumption via proecological beliefs.

## 186 Results

187 The analysis is preceded by a descriptive analysis of the scales included in the study. From Table  
 188 1, the mean scores (M), factor loadings and standard deviations of scale items of the solidarity  
 189 with animals scale were comparable to the original application of the scale. The estimates in this  
 190 study were however marginally lower. The alpha coefficients were high (>0.90) in both cases  
 191 suggesting that the items have a high internal consistency. Consistent with the findings of [11], the  
 192 mean scores of female participants (4.10) was significantly higher ( $t=2.36$ ;  $P$ -value 0.02) than those  
 193 of male participants (3.68). This supports the identified gender differences in solidarity with  
 194 animals reported in [11].

**Table 1. Descriptive Statistics and Factor Loadings for Items of Solidarity with Animals Scale**

| Items                                                    | This study |      |                | Amiot and Bastian (2017) |      |                |
|----------------------------------------------------------|------------|------|----------------|--------------------------|------|----------------|
|                                                          | M          | SD   | Factor loading | M                        | SD   | Factor loading |
| I feel a strong bond toward other animals (Strong bond)  | 4.19       | 0.92 | 0.65           | 4.97                     | 1.54 | 0.90           |
| I feel solidarity toward animals (Solidarity)            | 3.70       | 1.02 | 0.95           | 4.84                     | 1.57 | 0.88           |
| I feel close to other animals (Closeness)                | 4.03       | 0.95 | 0.80           | 4.57                     | 1.83 | 0.93           |
| I feel a strong connection to other animals (Connection) | 4.04       | 0.93 | 0.95           | 4.17                     | 1.89 | 0.94           |
| I feel committed toward animals (Commitment)             | 4.14       | 0.95 | 0.82           | 4.35                     | 1.84 | 0.85           |
| Cronbach's alpha                                         | 0.92       |      |                | 0.94                     |      |                |

195 Note: M=Mean; SD Standard Deviation

196



197 Most respondents (53%) strongly agreed with the statement that the use of antibiotics is a better  
198 strategy than destroying the affected animals (Fig 1). In contrast, most respondents (23%) were in  
199 strong disagreement with that statement that, overall, the use of animal antibiotics delivers more  
200 benefit than harm. Respondents were somewhat adverse (16% strongly disagree) to regulated use  
201 of antibiotics for serious bacterial disease. However, they seem to recognize the need for antibiotics  
202 use in livestock and believed that the process of development and testing of antibiotics was  
203 generally effective and safe ( 77% agree and strongly agree).

204 **Fig 1. Participants perceptions about the use of antibiotics in livestock**

205

206 Fig 2 shows the participants agreement with various attitudes towards the treatment of animals  
207 statements. The first three statements relate to ethical aspects of the treatment of animals whilst  
208 the remaining two assesses the role of animal welfare in food choice [24]. In general, respondents  
209 expressed higher levels of agreement with the latter statements as compared to the former three.  
210 Most respondents strongly agreed (53%) and agreed (35%) that the animal products they consumed  
211 are produced by animals that have experienced as little paid as possible. Another 77% strongly  
212 agreed (39%) and agreed (38%) with the statement that it was important to them that the products  
213 they consumed were sourced from animals whose rights have been respected. In contrast, a lower  
214 proportion of respondents agreed and strongly agreed with statements: humans have little respect  
215 for animals (46%); increased regulation of the treatment of animals is needed (49%); and, the  
216 treatment of animals raises serious ethical questions (55%). These trends are generally consistent  
217 with a estimates in Canada although the magnitudes differ (for example see [26]).

218 **Fig 2. Participants perceptions about the treatment of farm animals**

219

## 220 **Correlation analysis**

221 The Pearson correlation analysis to assess the relationship between the solidarity with animals  
222 scale and attitudes towards the treatment of animals and the use of antibiotics are reported in Tables  
223 2 and 3 respectively. The results indicate that there is positive significant correlation between the  
224 solidarity with animals and various items in the animal attitudes scale (Table 2). The correlations  
225 are however moderate to weak depending on the item. The stronger correlation was between the  
226 ethical treatment of animals statements, “It is important to me that animal products I eat have been  
227 produced in a way that the animal’s rights have been respected” ( $r=0.28$ ); and, “It is important to  
228 me that the animal products I eat have been produced in a way that the animals have experienced  
229 as little pain as possible” ( $r=0.32$ ). In contrast, correlations when positive was weaker for  
230 statements that assess perceptions towards animal welfare in food choice: increased regulation of  
231 the treatment of animals in farming is needed” ( $r=0.17$ ); and, “In general, humans have too little  
232 respect for the quality of life of farm animals” ( $r=0.15$ ). These results suggest a positive  
233 relationship between solidarity with the animals and perceptions about farm husbandry practices.  
234 The relationship is stronger for the ethical treatment issues as compare to the role of animal welfare  
235 in food choice.

236  
237 From Table 3, relationship between solidarity with animals and attitudes towards the use of  
238 antibiotics shows marked differences across the various items of the latter scale. Out of the seven  
239 items of the antibiotics use scale, two items, i.e. “We live in such a hygienic environment that the  
240 use of animal antibiotics is redundant” and “There is a good reason why the use of certain animal  
241 antibiotics is recommended”, were not significantly correlated solidarity with animals scale.  
242 statements on the trust in in regulation of antibiotic use, relative net benefit of antibiotic use and  
243 need for the mandated use of antibiotics to treat serious disease were all positively correlated with

244 the attitudes towards the use of antibiotics. Overall, these results suggest a positive but weak  
 245 association between solidarity with animals and support for the use of antibiotics in livestock

**Table 2. Results of Correlation Analysis: Solidarity with Animals and Attitudes Towards the Treatment of Animals**

|                                                                                                                                               | It is important to me that animal products I eat have been produced in a way that the animal's rights have been respected | It is important to me that the animal products I eat have been produced in a way that the animals have experienced as little pain as possible | The treatment of animals in livestock farming raises serious ethical questions | Increased regulation of the treatment of animals in farming is needed | In general, humans have too little respect for the quality of life of farm animals | solidarity with animals scale |
|-----------------------------------------------------------------------------------------------------------------------------------------------|---------------------------------------------------------------------------------------------------------------------------|-----------------------------------------------------------------------------------------------------------------------------------------------|--------------------------------------------------------------------------------|-----------------------------------------------------------------------|------------------------------------------------------------------------------------|-------------------------------|
| It is important to me that animal products I eat have been produced in a way that the animal's rights have been respected                     | 1                                                                                                                         |                                                                                                                                               |                                                                                |                                                                       |                                                                                    |                               |
| It is important to me that the animal products I eat have been produced in a way that the animals have experienced as little pain as possible | 0.59**                                                                                                                    | 1                                                                                                                                             |                                                                                |                                                                       |                                                                                    |                               |
| The treatment of animals in livestock farming raises serious ethical questions                                                                | 0.15*                                                                                                                     | 0.18**                                                                                                                                        | 1                                                                              |                                                                       |                                                                                    |                               |
| Increased regulation of the treatment of animals in farming is needed                                                                         | 0.23**                                                                                                                    | 0.26**                                                                                                                                        | 0.75**                                                                         | 1                                                                     |                                                                                    |                               |
| In general, humans have too little respect for the quality of life of farm animals                                                            | 0.21**                                                                                                                    | 0.15*                                                                                                                                         | 0.72**                                                                         | 0.67**                                                                | 1                                                                                  |                               |
| solidarity with animals scale                                                                                                                 | 0.28**                                                                                                                    | 0.32**                                                                                                                                        |                                                                                | 0.17*                                                                 | 0.15*                                                                              | 1                             |

246 Notes: \*\*\*Correlation is significant at the 0.01 level; \*\*Correlation is significant at the 0.05 level;  
 247 \*Correlation is significant at the 0.10; insignificant estimates not reported  
 248 .

**Table 3. Results of Correlation Analysis: Attitudes Towards the Use of Antibiotics and Solidarity with Animals**

|                                                                                                                         | The process of developing and testing antibiotics for use in livestock production proves their effectiveness and safety | The use of antibiotics is a better strategy than destroying the affected animals | For serious animal bacterial diseases, requirements for farmers to use antibiotics should be in place | We live in such a hygienic environment that the use of animal antibiotics is redundant | Overall, the use of animal antibiotics delivers more benefits than harm | Use of antibiotics in livestock cannot be seriously harmful; otherwise, authorities would ban the use | There is a good reason why the use of certain animal antibiotics is recommended | solidarity with animals scale |
|-------------------------------------------------------------------------------------------------------------------------|-------------------------------------------------------------------------------------------------------------------------|----------------------------------------------------------------------------------|-------------------------------------------------------------------------------------------------------|----------------------------------------------------------------------------------------|-------------------------------------------------------------------------|-------------------------------------------------------------------------------------------------------|---------------------------------------------------------------------------------|-------------------------------|
| The process of developing and testing antibiotics for use in livestock production proves their effectiveness and safety | 1                                                                                                                       |                                                                                  |                                                                                                       |                                                                                        |                                                                         |                                                                                                       |                                                                                 |                               |
| The use of antibiotics is a better strategy than destroying the affected animals                                        | 0.60**                                                                                                                  | 1                                                                                |                                                                                                       |                                                                                        |                                                                         |                                                                                                       |                                                                                 |                               |
| For serious animal bacterial diseases, requirements for farmers to use antibiotics should be in place                   | 0.41**                                                                                                                  | 0.48**                                                                           | 1                                                                                                     |                                                                                        |                                                                         |                                                                                                       |                                                                                 |                               |
| We live in such a hygienic environment that the use of animal antibiotics is redundant                                  |                                                                                                                         | -0.20**                                                                          | -0.16*                                                                                                | 1                                                                                      |                                                                         |                                                                                                       |                                                                                 |                               |
| Overall, the use of animal antibiotics delivers more benefits than harm                                                 | 0.53**                                                                                                                  | 0.48**                                                                           | 0.35**                                                                                                |                                                                                        | 1                                                                       |                                                                                                       |                                                                                 |                               |
| Use of antibiotics in livestock cannot be seriously harmful; otherwise, authorities would ban the use                   | 0.63**                                                                                                                  | 0.58**                                                                           | 0.51**                                                                                                | -0.21**                                                                                | 0.53**                                                                  | 1                                                                                                     |                                                                                 |                               |
| There is a good reason why the use of certain animal antibiotics is recommended                                         | 0.60**                                                                                                                  | 0.49**                                                                           | 0.44**                                                                                                |                                                                                        | 0.50**                                                                  | 0.52**                                                                                                | 1                                                                               |                               |
| solidarity with animals scale                                                                                           |                                                                                                                         |                                                                                  | 0.17*                                                                                                 |                                                                                        | 0.16*                                                                   | 0.19**                                                                                                |                                                                                 | 1                             |

252 We also assessed the correlation between the solidarity with animals and environmental beliefs  
 253 (Table 4). The results indicate that solidarity with animals is positively associated with selected  
 254 proecological beliefs and negatively correlated with anthropocentric beliefs. This is evident from  
 255 the positive correlation between the solidarity scale the proecological statement, “ Animals and  
 256 plants have a right to exist”, and the negative correlation with the anthropocentric statement, “The  
 257 ecological crises is exaggerated”. The association was stronger ( $r=+2.27$ ) in the case of the former  
 258 than the latter ( $r=-0.17$ ).

259 **Table 4. Results of Correlation Analysis: NEP Scale and Solidarity with Animal**

|                                                      | Plants and Animals Have a Right to Exist | Humans Have the Right to Modify Natural Environments | Interference with Nature | Nature Can Cope with Industrial Nations | Humans Abuse Environment | Ecological Crisis is Exaggerated | solidarity with animals scale |
|------------------------------------------------------|------------------------------------------|------------------------------------------------------|--------------------------|-----------------------------------------|--------------------------|----------------------------------|-------------------------------|
| Plants and Animals Have a Right to Exist             | 1                                        |                                                      |                          |                                         |                          |                                  |                               |
| Humans Have the Right to Modify Natural Environments | -0.20**                                  | 1                                                    |                          |                                         |                          |                                  |                               |
| Interference with Nature                             | 0.33**                                   | -0.30**                                              | 1                        |                                         |                          |                                  |                               |
| Nature Can Cope with Industrial Nations              | -0.19**                                  | 0.35**                                               | -0.26**                  | 1                                       |                          |                                  |                               |
| Humans Abuse Environment                             | 0.31**                                   | -0.26**                                              | 0.47**                   | -0.39**                                 | 1                        |                                  |                               |
| Ecological Crisis is Exaggerated                     | -0.34**                                  | 0.17*                                                | -0.26**                  | 0.48**                                  | -0.53**                  | 1                                |                               |
| solidarity with animals scale                        | 0.27**                                   |                                                      |                          |                                         |                          | -0.17*                           | 1                             |

260 Notes: \*\*\*Correlation is significant at the 0.01 level; \*\*Correlation is significant at the 0.05 level;  
 261 \*Correlation is significant at the 0.10; insignificant estimates not reported

262  
 263

#### 264 **Mediation Analysis**

265 The mediation analysis is preceded by an overview of self-reported pork consumption behavior  
 266 amongst survey participants. Most participants (37%) reported consuming pork 3-4 times a week.  
 267 A smaller proportion (3%) of participants reported eating pork daily or never (4%). Table 5 is a  
 268 summary of the results of the mediation model estimated.

269

**Table 5: Results of Mediation Analysis**

| <b>Outcome [Consumption]</b>              | <i>Direct effect (DE)</i> |      | <i>Total effect (TE)</i> |      |
|-------------------------------------------|---------------------------|------|--------------------------|------|
|                                           | Coefficient               | SE   | Coefficient              | SE   |
| NEP                                       | -0.27***                  | 0.10 | -0.27***                 | 0.10 |
| solidarity with animals                   | 0.04                      | 0.10 | 0.01                     | 0.10 |
| attitudes towards antibiotics use         | 0.02                      | 0.10 | 0.06                     | 0.10 |
| attitude towards the treatment of animals | -0.23**                   | 0.11 | -0.36***                 | 0.10 |

  

| <b>Outcome [NEP]</b>                      | <i>Direct effect (TE)</i> |      | <i>Total effect (TE)</i> |      |
|-------------------------------------------|---------------------------|------|--------------------------|------|
|                                           | Coefficient               | SE   | Coefficient              | SE   |
| solidarity with animals                   | 0.11*                     | 0.06 | 0.11*                    | 0.06 |
| attitudes towards antibiotics use         | -0.13**                   | 0.06 | -0.13**                  | 0.06 |
| attitude towards the treatment of animals | 0.46***                   | 0.07 | 0.46***                  | 0.67 |

Note: \*\*\*, \*\*, \* denote significance at 1%, 5% and 10% respectively; SE is standard error

270  
271

272 Attitudes towards the treatment of animals and proecological beliefs. (NEP) have a negative effect  
 273 on consumption. The direct effect and total effect of the former were -0.23 and -0.36 respectively.  
 274 This suggests that part of the effect of attitudes towards the treatment of animals on consumption  
 275 is mediated by proecological beliefs. Solidarity with animals did not have a direct effect on  
 276 consumption. However, its effect on proecological beliefs was positive (0.11). This suggests that  
 277 effect of solidarity with animals on pork consumption is fully mediated by proecological beliefs.  
 278 Attitudes towards antibiotic use in livestock had no direct effect on meat consumption. It was  
 279 negatively associated (-0.13) with proecological beliefs. Considering that the use of antibiotics  
 280 may be considered unnatural, this result is unsurprising.  
 281 In sum, the mediation analyses suggest attitudes concerns about livestock husbandry practices and  
 282 proecological beliefs reduce the tendency to consume meat. The effect of solidarity and attitudes  
 283 towards antibiotic on meat consumption is fully mediated by proecological beliefs.

## 284 **Discussion**

285 In this study we set out to investigate relationship between solidarity with animals, meat  
286 consumption and attitudes towards production practices. Specifically, we focused on attitudes  
287 towards the treatment of animals and the use of antibiotics. We found a positive but moderate  
288 association between solidarity with animals and these attitudes. This suggests individual with a  
289 stronger sense of social identification with farm animals may be more receptive to the use of  
290 antibiotics in livestock and proper care of farm animals. Solidarity with animals was also positively  
291 associated with proecological beliefs. The results further suggest the effect of solidarity with  
292 animals and attitudes towards antibiotic use on consumption is mediated by proecological beliefs.  
293 The indirect effect of solidarity with animals on consumption corroborates evidence from previous  
294 studies on the impact of human-animal on meat consumption [5, 22,28] The additional insights  
295 provided in this study is that, the effect of feelings of connection to animals is perhaps subsumed  
296 under a broader feeling of connectedness to nature. This outcome seems consistent with the  
297 relationship between solidarity with animals and speciesism reported in [11] and the role of animal  
298 welfare and ecological concerns in food choice [6, 27]. An important implication is that while  
299 solidarity with animals may invoke a higher degree of acceptance for practices that ameliorate the  
300 pain of farm animals, meat consumption may reduce their consumption of meat if these practices  
301 (e.g. the use of antibiotics) are considered unnatural. Given that the respondents in our sample are  
302 mostly non-vegetarian, the effect of proecological beliefs and attitudes towards the treatment of  
303 animals on consumption is indicative of possible conscientious omnivore behavior [29]. Where,  
304 respondents may not completely shift away from meat production but may purchase meat from  
305 ethical sources. For the conventional pork industry, potential negative impacts of these attitudes  
306 on consumption can be attenuated by addressing the concerns about antibiotics use as part of a  
307 broader range of ethical considerations (environmental and animal welfare). Partial approaches

308 may be less successful given the higher order linkages identified in the present study. Our results  
309 should be interpreted with a few caveats in mind. Our sample overrepresents female respondents  
310 (80%) and this can be a source of bias. We also did not consider other meat consumption  
311 behaviors-vegetarians, flexitarian, omnivores It is plausible that the role of solidarity with animals  
312 across the different consumption behavior and other livestock species [10, 19] may be different.  
313 These limitations are avenues for future research.

314

315

316

317

318

319

320

321

322

323

324

325

326

327

328

329

330



## 331 References

- 332 1. Lee JA, Sneddon JN, Daly TM, Schwartz SH, Soutar GN, Louviere JJ. Testing and  
333 extending Schwartz refined value theory using a best–worst scaling approach. *Assessment*.  
334 2019 Mar;26 (2):166-80.
- 335 2. De Backer CJ, Hudders L. Meat morals: relationship between meat consumption consumer  
336 attitudes towards human and animal welfare and moral behavior. *Meat science*. 2015 Jan  
337 1;99:68-74.
- 338 3. Hayley A, Zinkiewicz L, Hardiman K. Values, attitudes, and frequency of meat  
339 consumption. Predicting meat-reduced diet in Australians. *Appetite*. 2015 Jan 1;84:98-106.
- 340 4. Haverstock K, Forgy DK. To eat or not to eat. A comparison of current and former animal  
341 product limiters. *Appetite*. 2012 Jun 1;58(3):1030-6.
- 342 5. Bastian B, Loughnan S, Haslam N, Radke HR. Don't mind meat? The denial of mind to  
343 animals used for human consumption. *Personality and Social Psychology Bulletin*. 2012  
344 Feb;38(2):247-56.
- 345 6. Thomas EF, Bury SM, Louis WR, Amiot CE, Molenberghs P, Crane MF, Decety J.  
346 Vegetarian, vegan, activist, radical: Using latent profile analysis to examine different forms  
347 of support for animal welfare. *Group Processes & Intergroup Relations*. 2019  
348 Sep;22(6):836-57.
- 349 7. Plous S. Psychological mechanisms in the human use of animals. *Journal of Social Issues*.  
350 1993 Apr;49(1):11-52.
- 351 8. Bilewicz M, Imhoff R, Drogosz M. The humanity of what we eat: Conceptions of human  
352 uniqueness among vegetarians and omnivores. *European Journal of Social Psychology*.  
353 2011 Mar;41(2):201-9.
- 354 9. Ang CS, Chan NN, Singh L. A comparison study of meat eaters and non-meat eaters on  
355 mind attribution and moral disengagement of animals. *Appetite*. 2019 May 1;136:80-5.
- 356 10. Wang F, Basso F. “Animals are friends, not food”: Anthropomorphism leads to less  
357 favorable attitudes toward meat consumption by inducing feelings of anticipatory guilt.  
358 *Appetite*. 2019 Jul 1;138:153-73.
- 359 11. Amiot CE, Bastian B. Solidarity with animals: Assessing a relevant dimension of social  
360 identification with animals. *PloS one*. 2017 Jan 3;12(1):e0168184.
- 361 12. Leach CW, Van Zomeren M, Zebel S, Vliek ML, Pennekamp SF, Doosje B, Ouwerkerk  
362 JW, Spears R. Group-level self-definition and self-investment: a hierarchical  
363 (multicomponent) model of in-group identification. *Journal of personality and social  
364 psychology*. 2008 Jul;95(1):144.
- 365 13. Speksnijder DC, Mevius DJ, Brusckhe CJ, Wagenaar JA. Reduction of veterinary  
366 antimicrobial use in the Netherlands. The Dutch success model. *Zoonoses and public  
367 health*. 2015 Apr;62:79-87.
- 368 14. Nguyen C, Phu DH, Van NT, Truong BD, Kiet BT, Vo HB, Ho VT, Choisy M, Padungtod  
369 P, Thwaites G, Carrique-Mas JJ. High resolution monitoring of antimicrobial consumption  
370 in Vietnamese small-scale chicken farms highlights discrepancies between study metrics.  
371 *Frontiers in Veterinary Science*. 2019;6:174.
- 372 15. Food and Agricultural Organization. *Antimicrobial Resistance: What is?*  
373 <http://www.fao.org/antimicrobial-resistance/background/what-is-it/en/> [01/23/2019]
- 374 16. Natural Resource Defense Council (NRDC). Report: *US pigs consume nearly as many*  
375 *antibiotics as people do*. [http://www.cidrap.umn.edu/news-perspective/2018/06/report-us-](http://www.cidrap.umn.edu/news-perspective/2018/06/report-us-pigs-consume-nearly-many-antibiotics-people-do)  
376 [pigs-consume-nearly-many-antibiotics-people-do](http://www.cidrap.umn.edu/news-perspective/2018/06/report-us-pigs-consume-nearly-many-antibiotics-people-do) [01/23/2019]

- 377 17. Bryant CJ, Szejda K, Deshpande V, Parekh N, Tse B. A Survey of Consumer Perceptions  
378 of Plant-Based and Clean Meat in the USA, India, and China. *Frontiers in Sustainable Food*  
379 *Systems*. 2019;3:11.
- 380 18. Ruby MB, Heine SJ. Too close to home. Factors predicting meat avoidance. *Appetite*. 2012  
381 Aug 1;59(1):47-52.
- 382 19. Robbins J, Franks B, von Keyserlingk MA. ‘More than a feeling’: An empirical  
383 investigation of hedonistic accounts of animal welfare. *PloS one*. 2018 Mar  
384 12;13(3):e0193864.
- 385 20. Dunlap RE, Van Liere KD, Mertig AG, Jones RE. New trends in measuring environmental  
386 attitudes: measuring endorsement of the new ecological paradigm: a revised NEP scale.  
387 *Journal of social issues*. 2000;56(3):425-42.
- 388 21. Heuer, N. (2014). Exploring European students' meat consumption behavior: a survey-  
389 based analysis of the relationships between various explanatory variables and meat  
390 consumption (Master's thesis).
- 391 22. Butterfield ME, Hill SE, Lord CG. Mangy mutt or furry friend? Anthropomorphism  
392 promotes animal welfare. *Journal of Experimental Social Psychology*. 2012 Jul  
393 1;48(4):957-60.
- 394 23. United States Census Bureau - U.S. Census Bureau Quickfacts: Wisconsin. Internet site:  
395 <https://www.census.gov/quickfacts/wi> (Accessed April 15, 2019).
- 396 24. Cembalo L, Caracciolo F, Lombardi A, Del Giudice T, Grunert KG, Cicia G. Determinants  
397 of individual attitudes toward animal welfare-friendly food products. *Journal of*  
398 *Agricultural and Environmental Ethics*. 2016 Apr 1;29(2):237-54.
- 399 25. Zingg A, Siegrist M. People’s willingness to eat meat from animals vaccinated against  
400 epidemics. *Food Policy*. 2012 Jun 1;37(3):226-31.
- 401 26. Goddard E, Hartmann M, Klink-Lehmann J. Public acceptance of antibiotic use in  
402 livestock production Canada and Germany. In *International European Forum*, February 13-  
403 17, 2017, Innsbruck-Igls, Austria 2017 Jun 29 (Vol. 2017, No. 1012-2017-709, pp. 424-  
404 437).
- 405 27. Lindeman M, Sirelius M. Food choice ideologies: the modern manifestations of normative  
406 and humanist views of the world. *Appetite*. 2001 Dec 1;37(3):175-84.
- 407 28. Rothgerber H, Mican F. Childhood pet ownership, attachment to pets, and subsequent meat  
408 avoidance. The mediating role of empathy toward animals. *Appetite*. 2014 Aug 1;79:11-7.
- 409 29. Rothgerber H. Underlying differences between conscientious omnivores and vegetarians  
410 in the evaluation of meat and animals. *Appetite*. 2015 Apr 1;87:251-8.

411

bioRxiv preprint doi: <https://doi.org/10.1101/2020.01.30.926592>; this version posted January 30, 2020. The copyright holder for this preprint (which was not certified by peer review) is the author/funder, who has granted bioRxiv a license to display the preprint in perpetuity. It is made available under aCC-BY 4.0 International license.

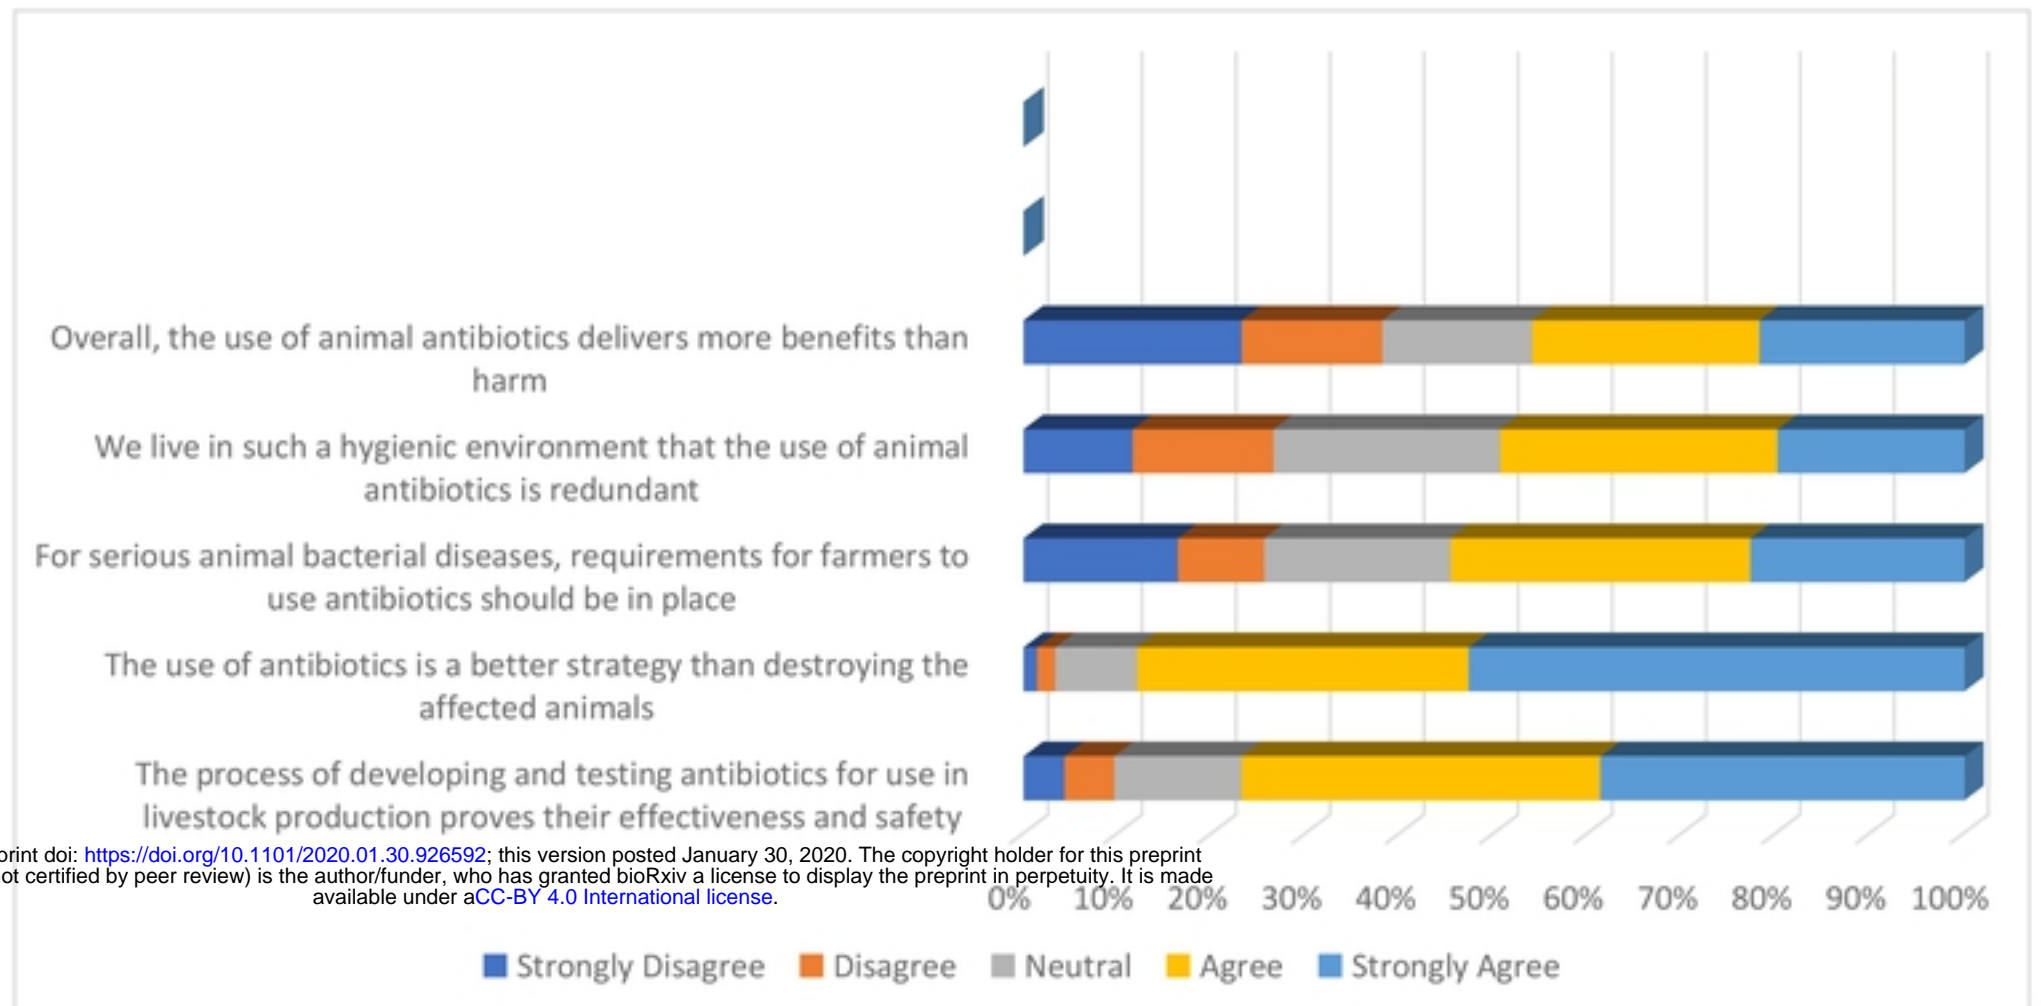

**Fig 1. Participants attitudes towards the use of antibiotics in livestock**

bioRxiv preprint doi: <https://doi.org/10.1101/2020.01.30.926592>; this version posted January 30, 2020. The copyright holder for this preprint (which was not certified by peer review) is the author/funder, who has granted bioRxiv a license to display the preprint in perpetuity. It is made available under aCC-BY 4.0 International license.

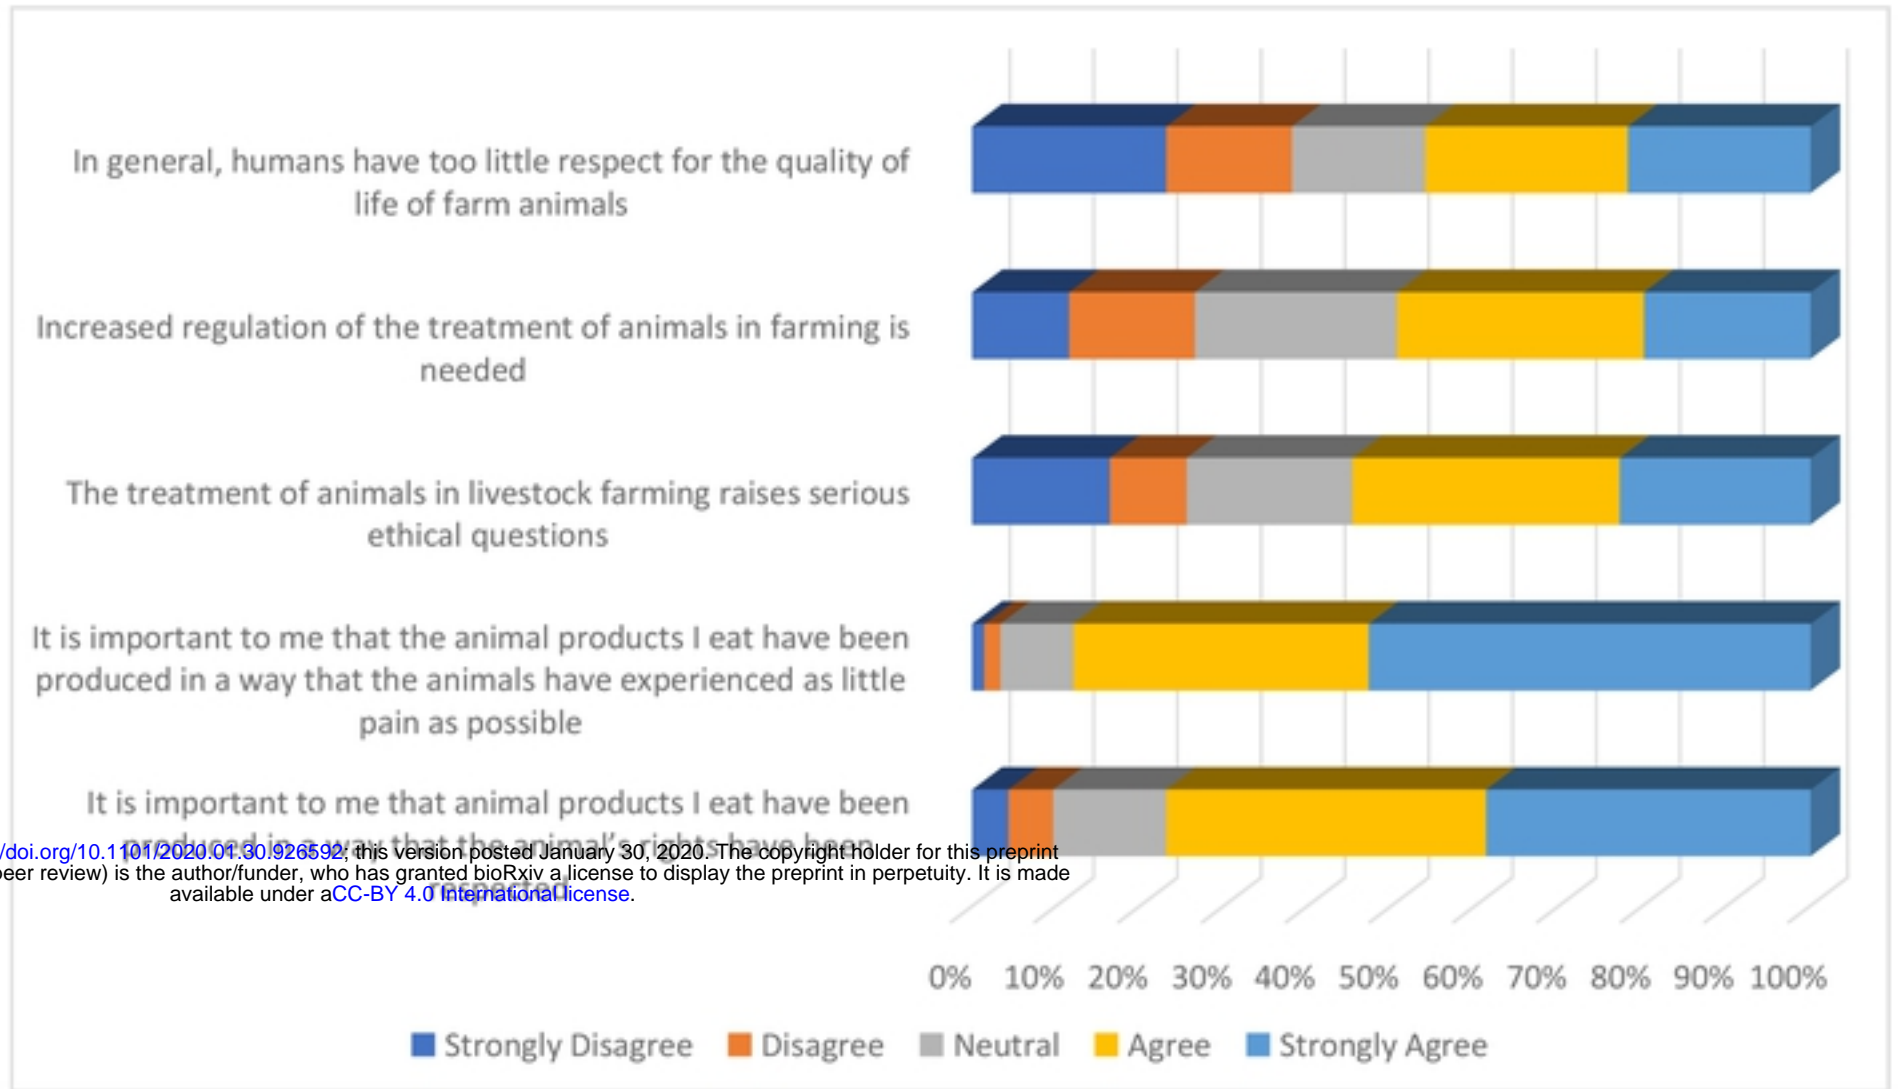

**Fig 2. Participants attitudes towards the treatment of farm animals**
